# Supplementary material
Source: PubMed Central journal article supplement (PMC5016255)
Supplement: NIHMS803203-supplement-Supplemental_Material.pdf [file NIHMS803203-supplement-Supplemental_Material.pdf]

## ONLINE SUPPLEMENT

### **Body Mass Index predicts 24-hr Urinary Aldosterone Levels in Patients with Resistant Hypertension**

Tanja Dudenbostel, MD<sup>1</sup>; Lama Ghazi, MD<sup>1</sup>, Mingchun Liu, BS<sup>2</sup>, Peng Li, PhD<sup>3</sup>, Suzanne Oparil, MD<sup>1</sup>, David A. Calhoun, MD<sup>1</sup>

<sup>1</sup>Division of Cardiovascular Disease, Vascular Biology and Hypertension Program  
University of Alabama at Birmingham, Birmingham, AL

<sup>2</sup>School of Medicine, University of Alabama at Birmingham, Birmingham, AL

<sup>3</sup>Department of Biostatistics, School of Public Health, University of Alabama at Birmingham, Birmingham, AL

**Supplemental Table S1.** Distribution of antihypertensive agents across quartiles of body mass index. Values are mean  $\pm$  SD.

| <b>Quartiles of BMI</b>              |                   |               |               |               |
|--------------------------------------|-------------------|---------------|---------------|---------------|
| <b>Medication</b>                    | 1.Quartile, %     | 2.Quartile, % | 3.Quartile, % | 4.Quartile, % |
| <b><math>\alpha</math>-1 blocker</b> | 11.7 <sup>†</sup> | 31.2*         | 31.3*         | 38.1*         |
| <b><math>\beta</math>- blocker</b>   | 30.4 <sup>†</sup> | 73.9*         | 64.9*         | 70.0*         |
| <b>ACEi</b>                          | 20.2 <sup>†</sup> | 47.1*         | 46.6*         | 51.0*         |
| <b>ARB</b>                           | 20.8 <sup>†</sup> | 41.3*         | 45.0*         | 49.0*         |
| <b>CCB</b>                           | 27.9 <sup>†</sup> | 58.7*         | 61.0*         | 66.6*         |
| <b>Diuretic</b>                      | 32.2 <sup>†</sup> | 78.3*         | 76.3*         | 81.6*         |
| <b>Other</b>                         | 11.0 <sup>†</sup> | 26.8*         | 22.9*         | 27.9*         |

SD - standard deviation; BMI – body mass index;  $\alpha$  1 – alpha 1;  $\beta$  – beta; ACEi – angiotensin-converting-enzyme inhibitor; ARB – angiotensin II receptor blocker; CCB - Calcium channel blocker; Other include vasodilators,  $\alpha$ -2 agonists. Patients in the 1. Quartile of BMI were treated with less medications when compared with patients in the 2<sup>nd</sup>, 3<sup>rd</sup>, and 4<sup>th</sup> quartile of BMI, while there was no difference between patients in the 2<sup>nd</sup>, 3<sup>rd</sup>, and 4<sup>th</sup> quartile of BMI.

\* Non-significant

† p<0.05

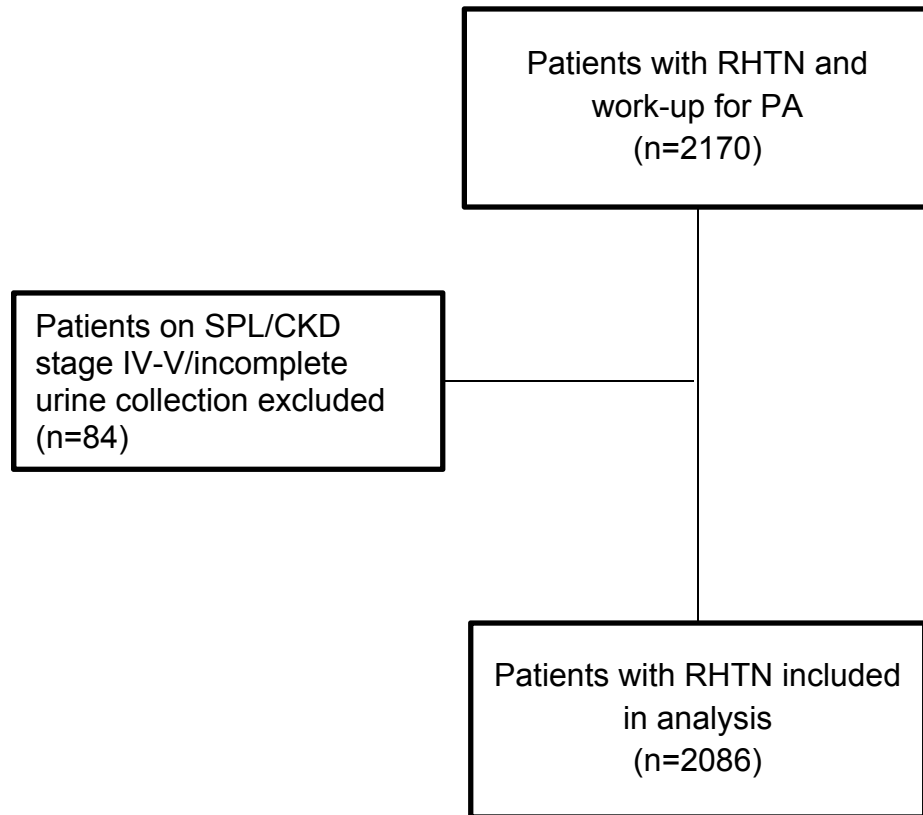

Supplemental Figure S1: Study flow chart

Patients with resistant hypertension (RHTN) treated with a mineralocorticoid receptor antagonist (MRA), chronic kidney disease (CKD) stage IV-V/ incomplete urine collection were excluded (n=84)
